# Supplementary material for: Do comprehensive deep learning algorithms suffer from hidden stratification? A retrospective study on pneumothorax detection in chest radiography
Source: HighWire-hosted journal article supplement (doi:10.1136/bmjopen-2021-053024), 2021-12-01
Supplement: bmjopen-2021-053024supp001_data_supplement.pdf [file bmjopen-2021-053024supp001_data_supplement.pdf]

## Appendix A

| <b>Finding</b>          | <b>Definition</b>                                                                                                               |
|-------------------------|---------------------------------------------------------------------------------------------------------------------------------|
| Simple pneumothorax     | Air within the thoracic cavity outside of the lung. May be associated with lung edge.                                           |
| Tension pneumothorax    | Air within the thoracic cavity outside of the lung. May be associated with lung edge. Resultant mediastinal shift.              |
| Acute rib fracture      | Cortical breach of a rib without callus formation or union, does not include surgical rib resection or thoracotomy.             |
| Acute clavicle fracture | Cortical breach of a clavicle. May be difficult to see if nondisplaced. No callus formation for acute fractures.                |
| Acute humerus fracture  | Cortical breach of the humerus, usually at the surgical neck of humerus.                                                        |
| Scapular fracture       | Cortical breach of the scapula. This includes both acute and chronic fractures.                                                 |
| Subcutaneous emphysema  | Air within the soft tissues outside the abdominal or thoracic cavity. May be associated with pneumothorax or pneumomediastinum. |
| Intercostal drain       | Catheter within the pleural space to drain fluid and / or gas.                                                                  |

## Appendix B

### Co-Occurrence Matrix of Subgroups

| All Cases                 | Non erect | No fractures | No subcutaneous emphysema | No intercostal drain |
|---------------------------|-----------|--------------|---------------------------|----------------------|
| Non erect                 | 595       | 513          | 526                       | 440                  |
| No Fractures              | 513       | 2017         | 1893                      | 1772                 |
| No subcutaneous emphysema | 526       | 1893         | 2409                      | 2222                 |
| No intercostal drain      | 440       | 1772         | 2222                      | 2277                 |

| Simple pneumothorax       | Non erect | No fractures | No subcutaneous emphysema | No intercostal drain |
|---------------------------|-----------|--------------|---------------------------|----------------------|
| Non erect                 | 64        | 51           | 32                        | 10                   |
| No Fractures              | 51        | 130          | 79                        | 50                   |
| No subcutaneous emphysema | 32        | 79           | 96                        | 42                   |
| No intercostal drain      | 10        | 50           | 42                        | 65                   |

| Tension pneumothorax      | Non erect | No fractures | No subcutaneous emphysema | No intercostal drain |
|---------------------------|-----------|--------------|---------------------------|----------------------|
| Non erect                 | 19        | 17           | 16                        | 9                    |
| No Fractures              | 17        | 45           | 40                        | 35                   |
| No subcutaneous emphysema | 16        | 40           | 44                        | 37                   |
| No intercostal drain      | 9         | 35           | 37                        | 39                   |
